# Supplementary material for: Sorption and Desorption Analysis of Nitrobenzene on Differently Functionalized Multiwalled Carbon Nanotubes and Implications on the Stability
Source: MDPI journal article supplement (doi:10.3390/w13101426), 2021-05-20
Supplement: s1 [file s1]

# Sorption and desorption analysis of nitrobenzene on differently functionalized multiwalled carbon nanotubes and implications on the stability

Zhanhua Ji <sup>1,2</sup> and Dengyu Li <sup>1,\*</sup>

<sup>1</sup> Key Laboratory of Pollution Ecology and Environmental Engineering, Institute of Applied Ecology, Chinese Academy of Sciences, Shenyang 110016, China; jizhanhua12@mails.ucas.ac.cn

<sup>2</sup> College of Resources and Environment, University of Chinese Academy of Sciences, Beijing 100049, China

\* Correspondence: lidengyu@iae.ac.cn

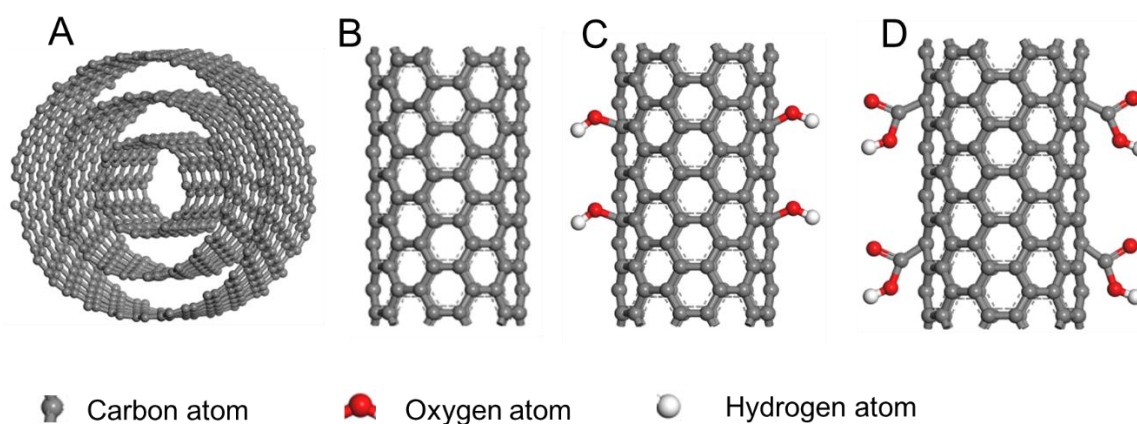

**Figure S1.** The chemical structure sketches of three functionalized carbon nanotubes: (A) multiwalled structure of three carbon nanotubes; (B) the surface of G-CNTs; (C) the surface of H-CNTs; (D) the surface of C-CNTs.

**Table S1.** Selected physicochemical properties of CNTs.

| CNTs   | Surface O <sup>a</sup><br>(wt%)                          | Functionalized surface C <sup>b</sup><br>(wt%)           | Total O <sup>c</sup> (wt%)                                  | L <sup>d</sup><br>( $\mu\text{m}$ )                       | OD <sup>e</sup><br>(nm)                                   | ID <sup>f</sup><br>(nm)                 | SSA <sup>g</sup><br>( $\text{m}^2/\text{g}$ ) |
|--------|----------------------------------------------------------|----------------------------------------------------------|-------------------------------------------------------------|-----------------------------------------------------------|-----------------------------------------------------------|-----------------------------------------|-----------------------------------------------|
| G-CNTs | 0.7                                                      | <0.7                                                     | <0.1                                                        | 5–30                                                      | 10–20                                                     | 5–10                                    | 133.6                                         |
| H-CNTs | 4.1                                                      | 4.28                                                     | 2.9                                                         | 5–30                                                      | 10–20                                                     | 5–10                                    | 159.4                                         |
| C-CNTs | 4.2                                                      | 2.19                                                     | 0.5                                                         | 5–30                                                      | 10–20                                                     | 5–10                                    | 145.5                                         |
| CNTs   | $S_{\text{mic}}^{\text{h}}$<br>( $\text{m}^2/\text{g}$ ) | $S_{\text{mes}}^{\text{i}}$<br>( $\text{m}^2/\text{g}$ ) | $V_{\text{total}}^{\text{j}}$<br>( $\text{cm}^3/\text{g}$ ) | $V_{\text{mic}}^{\text{k}}$<br>( $\text{cm}^3/\text{g}$ ) | $V_{\text{mes}}^{\text{l}}$<br>( $\text{cm}^3/\text{g}$ ) | $D_{\text{average}}^{\text{m}}$<br>(nm) | $D_{\text{mes}}^{\text{n}}$<br>(nm)           |
| G-CNTs | 6.4                                                      | 133.9                                                    | 0.257                                                       | 0.002                                                     | 0.627                                                     | 3.8                                     | 9.4                                           |
| H-CNTs | 12.7                                                     | 155.2                                                    | 0.310                                                       | 0.005                                                     | 0.800                                                     | 3.9                                     | 10.3                                          |
| C-CNTs | 10.2                                                     | 140.6                                                    | 0.280                                                       | 0.004                                                     | 0.636                                                     | 3.9                                     | 9.0                                           |

<sup>a</sup> Surface O, Surface oxygen content, was measured by X-ray photoelectron spectroscopy (XPS); <sup>b</sup> Functionalized surface carbon (wt%) was calculated according to XPS result, functionalized surface carbon (wt%) = the ratio of oxidized carbon atoms to total carbon atoms; <sup>c</sup> Total O, Total oxygen content was measured by Elemental Analyzer; <sup>d</sup> L, length of the CNTs; <sup>e</sup> OD, outer diameter of the CNTs; <sup>f</sup> ID, inner diameter of the CNTs; <sup>g</sup> SSA, Special surface area, was measured by N<sub>2</sub> adsorption using the Brunauer-Emmett-Teller (BET) method; <sup>h</sup>  $S_{\text{mic}}$ , micropore surface area, was obtained using the t-plot theory; <sup>i</sup>  $S_{\text{mes}}$ , mesopore surface area, was calculated using the Barrett-Johnner- Halendar (BJH) theory; <sup>j</sup>  $V_{\text{total}}$ , total pore volume was measured by N<sub>2</sub> adsorption using the BET method; <sup>k</sup>  $V_{\text{mic}}$ , micropore volume, was obtained using the t-plot theory; <sup>l</sup>  $V_{\text{mes}}$ , mesopore volume, was calculated using the Barrett-Johnner- Halendar (BJH) theory; <sup>m</sup>  $D_{\text{average}}$ , average pore diameter of the CNTs, was measured by N<sub>2</sub> adsorption using the BET method; <sup>n</sup>  $D_{\text{mes}}$ , the mesopore diameter, was calculated using the Barrett-Johnner- Halendar (BJH) theory.

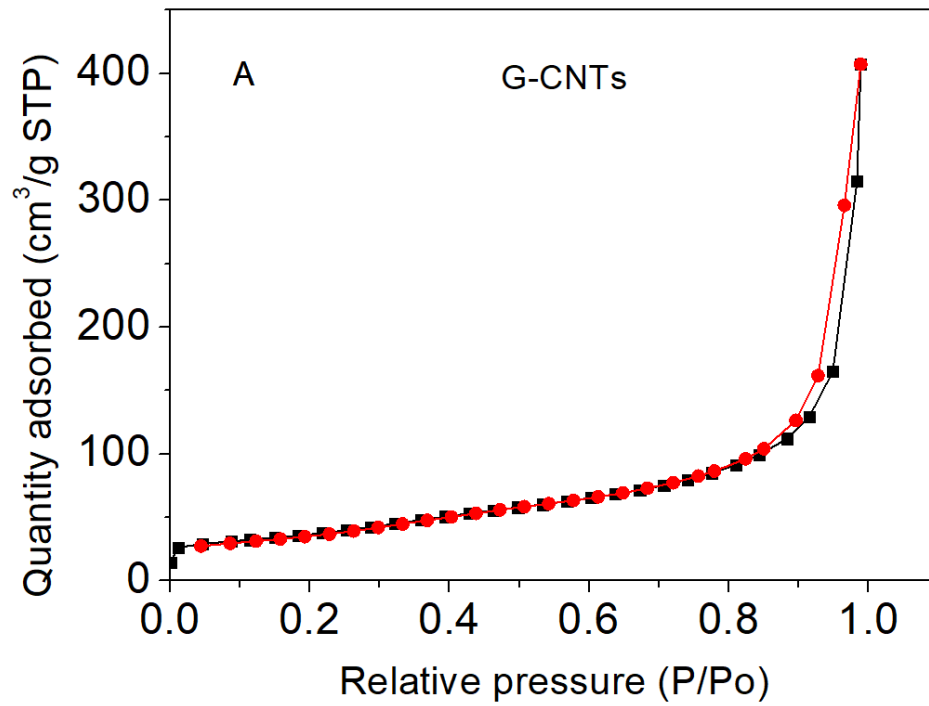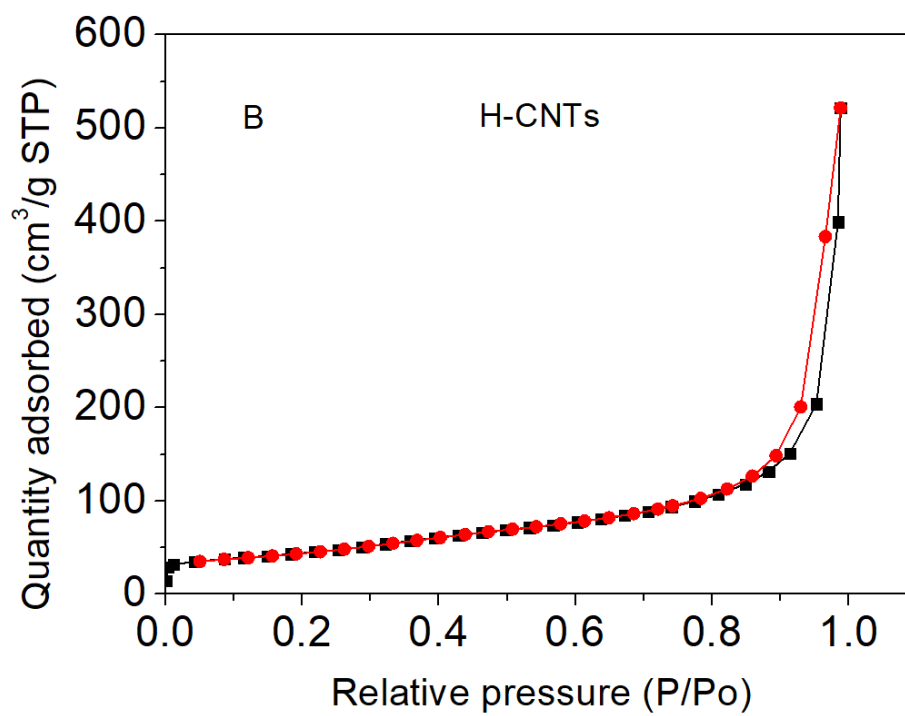

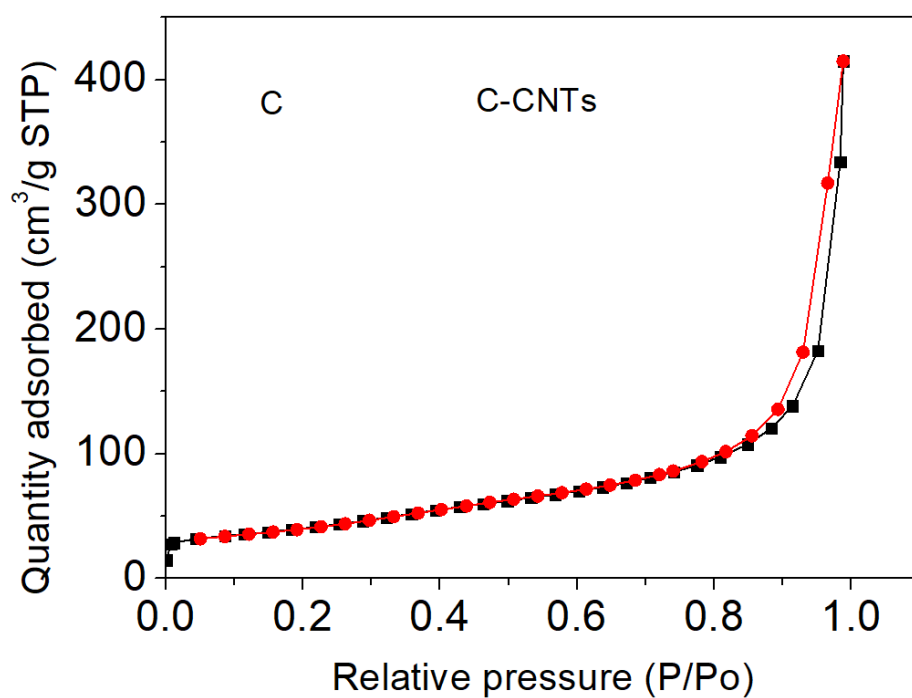

**Figure S2.** The nitrogen adsorption-desorption isotherms that were obtained using a surface area and porosimetry analyzer (ASAP 2460, Micromeritics, USA): (A) G-CNTs; (B) H-CNTs; (C) C-CNTs.

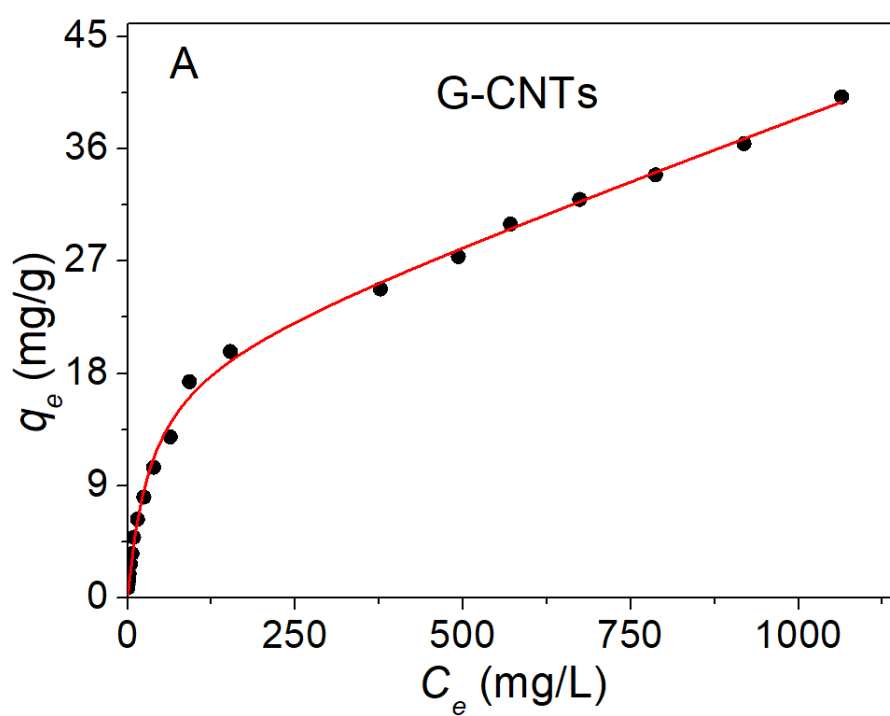

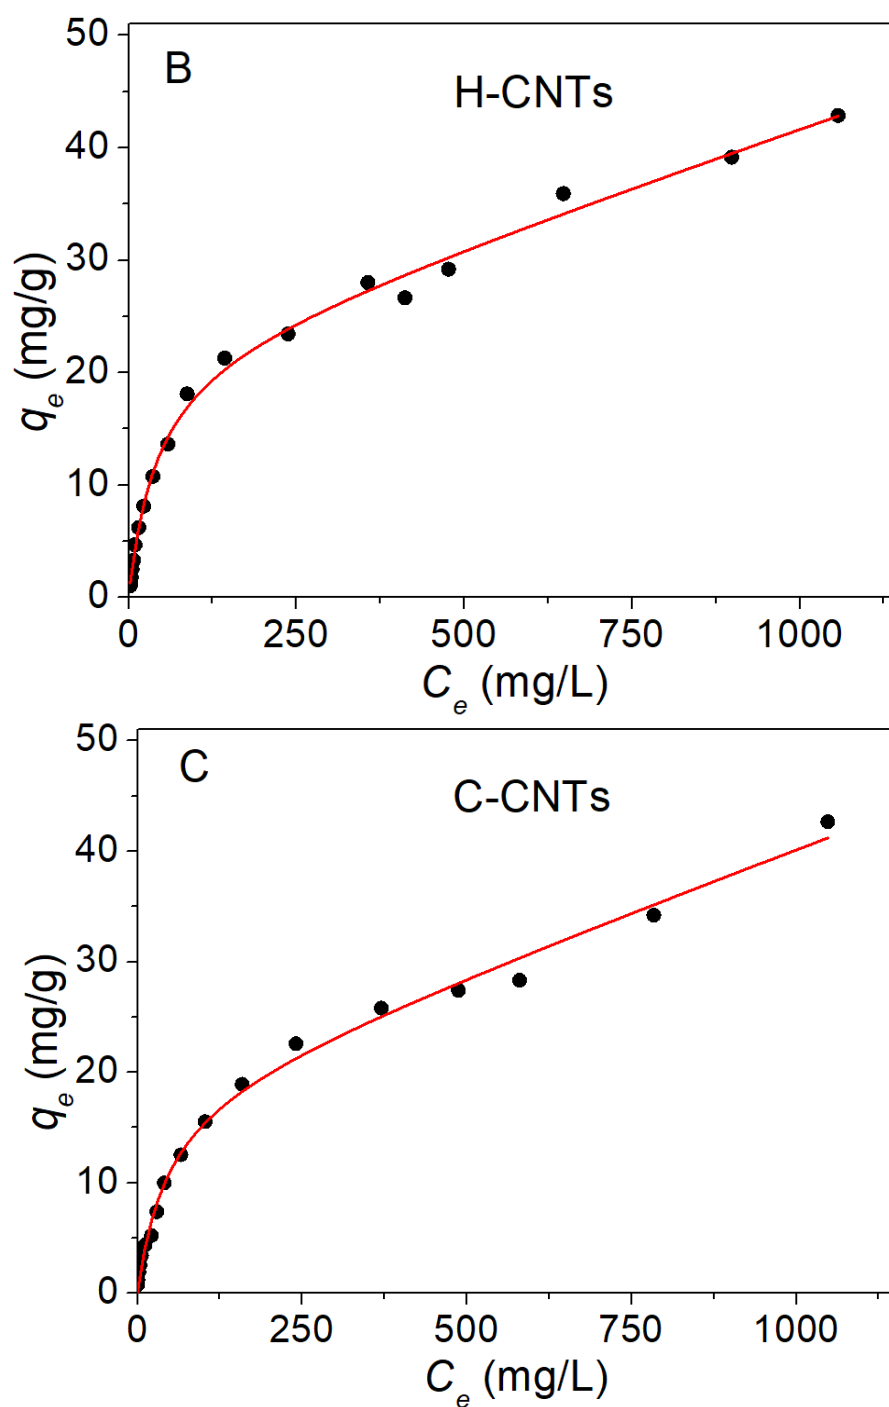

**Figure S3.** Sorption isotherms of nitrobenzene by three functionalized carbon nanotubes: (A) G-CNTs; (B) H-CNTs; (C) C-CNTs. Solid lines are the isotherms fitted by DMM model.

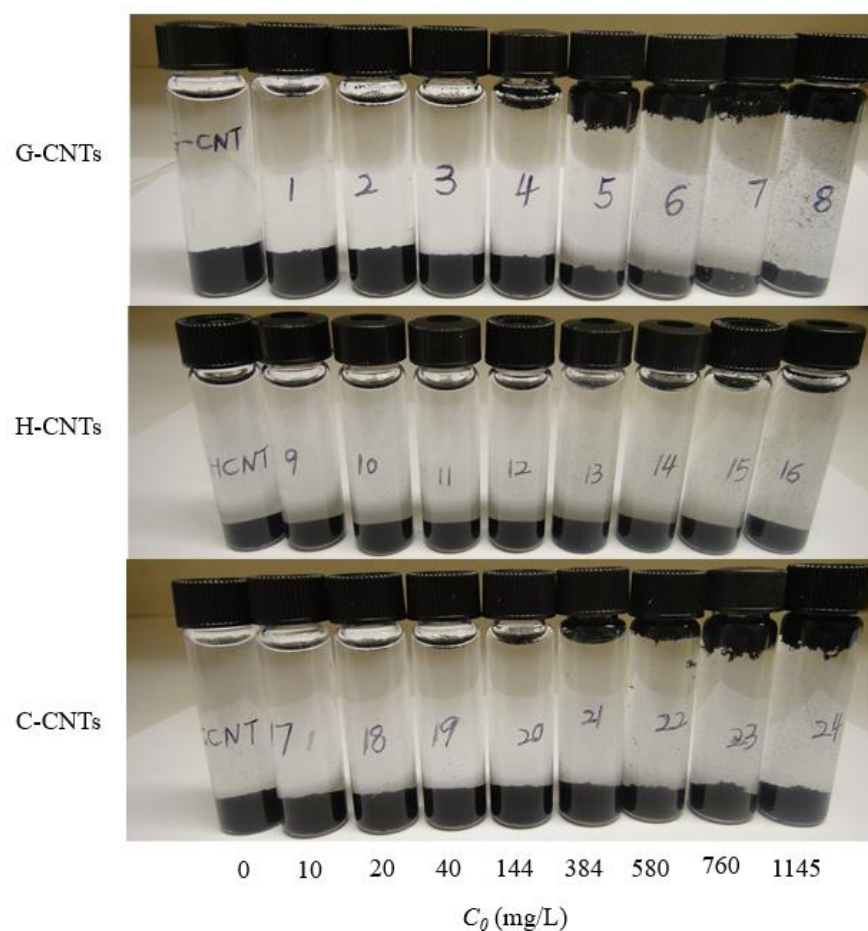

**Figure S4.** Photo of three functionalized MWCNTs suspension with different initial concentration of nitrobenzene after 72 h shaking and 1 hour' settlement.

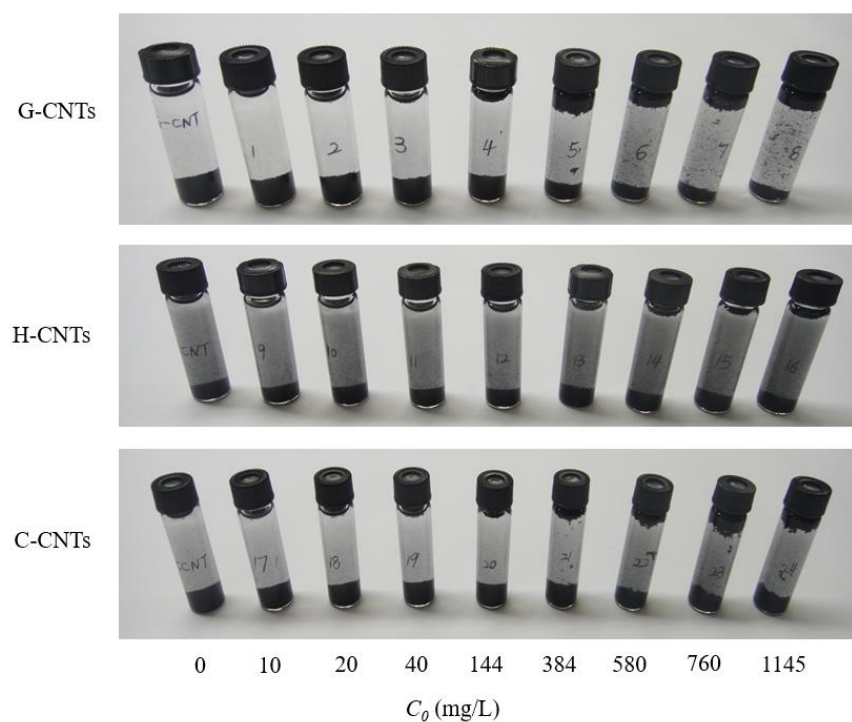

**Figure S5.** Photo of three functionalized MWCNTs suspension with different initial concentration of nitrobenzene after 72 h shaking and 5 minutes' settlement [48].
